# Supplementary material for: FLUTE: Fast and reliable knowledge retrieval from biomedical literature
Source: Database (Oxford). 2020 Aug 6;2020:baaa056. doi: 10.1093/database/baaa056 (PMC7408180; doi:10.1093/database/baaa056)
Supplement: SupplementaryTable1 [file supplementarytable1.xlsx]

## Sheet: Sheet1
Query	Citations (#)	Citations found in FLUTE DB (#)	New interactions from FLUTE DB (#)
Process and Protein	5	5	20
Disease and Process	14	1	6
Multiple Protein	112	45	246
